# Supplementary material for: Sentinel-2 Enables Nationwide Monitoring of Single Area Payment Scheme and Greening Agricultural Subsidies in Hungary
Source: MDPI journal article supplement (doi:10.3390/rs14163917), 2022-08-12
Supplement: s1 [file s1]

Table S1. Confusion matrix of crop categorization with Random Forest.

| Class data     | Reference Data |      |      |      |      |       |        |      |       |        |       |      |       |        |       |       |      |      |      |       |      |      |       |       |              |            |
|----------------|----------------|------|------|------|------|-------|--------|------|-------|--------|-------|------|-------|--------|-------|-------|------|------|------|-------|------|------|-------|-------|--------------|------------|
|                | SHR            | SUG  | OTH  | ENER | FRST | TREE  | GRAS   | HERB | WEED  | MAIZ   | ALF   | REED | SUNF  | WCER   | FLAND | RAPS  | RICE | FIBP | SOY  | GRPE  | FVEG | FPLA | SCER  | VEG   | $\Sigma$ REF | Recall (%) |
| SHR            | 311            | 0    | 0    | 0    | 4    | 584   | 620    | 0    | 2     | 28     | 106   | 0    | 17    | 26     | 339   | 1     | 0    | 0    | 0    | 780   | 0    | 3    | 5     | 18    | 2844         | 10.9       |
| SUG            | 0              | 962  | 0    | 0    | 0    | 3     | 1      | 0    | 0     | 28     | 4     | 0    | 81    | 1      | 1     | 0     | 0    | 0    | 6    | 1     | 0    | 2    | 4     | 13    | 1107         | 86.9       |
| OTH            | 0              | 0    | 7    | 0    | 0    | 0     | 1      | 0    | 0     | 0      | 0     | 0    | 0     | 0      | 1     | 0     | 0    | 0    | 0    | 0     | 0    | 0    | 0     | 0     | 9            | 77.8       |
| ENER           | 0              | 0    | 0    | 26   | 0    | 2     | 48     | 0    | 0     | 5      | 8     | 1    | 0     | 2      | 12    | 0     | 0    | 0    | 0    | 1     | 0    | 0    | 0     | 1     | 106          | 24.5       |
| FRST           | 0              | 0    | 0    | 0    | 4169 | 431   | 918    | 0    | 5     | 33     | 54    | 0    | 15    | 3      | 186   | 0     | 0    | 0    | 0    | 105   | 3    | 1    | 3     | 71    | 5997         | 69.5       |
| TREE           | 26             | 2    | 0    | 0    | 286  | 18943 | 3301   | 1    | 1     | 172    | 546   | 0    | 85    | 134    | 1594  | 4     | 0    | 0    | 1    | 1245  | 24   | 2    | 65    | 320   | 26752        | 70.8       |
| GRAS           | 15             | 5    | 0    | 0    | 191  | 1263  | 133470 | 1    | 12    | 626    | 5952  | 5    | 321   | 1216   | 2710  | 39    | 1    | 0    | 20   | 555   | 53   | 135  | 283   | 55    | 146928       | 90.8       |
| HERB           | 0              | 9    | 0    | 0    | 1    | 178   | 252    | 742  | 0     | 251    | 141   | 0    | 144   | 258    | 485   | 90    | 0    | 0    | 4    | 119   | 155  | 42   | 60    | 662   | 3593         | 7.0        |
| WEED           | 0              | 0    | 0    | 0    | 12   | 21    | 152    | 0    | 11003 | 14     | 13    | 0    | 13    | 4      | 25    | 0     | 0    | 0    | 2    | 7     | 1    | 0    | 0     | 0     | 11267        | 97.7       |
| MAIZ           | 1              | 7    | 0    | 0    | 13   | 146   | 263    | 6    | 1     | 175697 | 266   | 0    | 2085  | 1218   | 925   | 70    | 3    | 0    | 122  | 220   | 90   | 83   | 378   | 389   | 181983       | 96.6       |
| ALF            | 3              | 6    | 0    | 0    | 9    | 344   | 5366   | 2    | 5     | 452    | 40814 | 0    | 326   | 539    | 979   | 26    | 0    | 0    | 18   | 262   | 79   | 78   | 268   | 94    | 49670        | 82.2       |
| REED           | 0              | 0    | 0    | 0    | 12   | 9     | 77     | 0    | 1     | 37     | 0     | 98   | 3     | 0      | 3     | 0     | 0    | 0    | 0    | 0     | 0    | 0    | 0     | 3     | 243          | 40.3       |
| SUNF           | 0              | 18   | 0    | 0    | 1    | 35    | 97     | 2    | 2     | 1743   | 97    | 0    | 88762 | 424    | 572   | 57    | 5    | 0    | 41   | 68    | 64   | 28   | 70    | 221   | 92307        | 96.2       |
| WCER           | 1              | 2    | 0    | 0    | 4    | 87    | 595    | 4    | 2     | 1336   | 494   | 0    | 494   | 192669 | 1551  | 264   | 1    | 1    | 18   | 87    | 56   | 75   | 863   | 66    | 198670       | 96.9       |
| FLAND          | 9              | 6    | 0    | 0    | 64   | 832   | 6834   | 12   | 15    | 1063   | 1077  | 1    | 1252  | 2323   | 17762 | 97    | 3    | 0    | 34   | 1020  | 240  | 90   | 427   | 553   | 33714        | 52.7       |
| RAPS           | 0              | 1    | 0    | 0    | 0    | 16    | 59     | 6    | 0     | 108    | 59    | 0    | 67    | 755    | 145   | 35718 | 0    | 0    | 7    | 2     | 3    | 8    | 33    | 10    | 36997        | 96.5       |
| RICE           | 0              | 0    | 0    | 0    | 0    | 0     | 0      | 0    | 0     | 6      | 0     | 0    | 1     | 0      | 1     | 0     | 540  | 0    | 0    | 0     | 0    | 0    | 0     | 0     | 548          | 98.5       |
| FIBP           | 0              | 0    | 0    | 0    | 0    | 2     | 1      | 0    | 0     | 15     | 0     | 0    | 15    | 1      | 10    | 0     | 0    | 19   | 14   | 1     | 1    | 1    | 2     | 1     | 83           | 22.9       |
| SOY            | 0              | 2    | 0    | 0    | 0    | 2     | 5      | 0    | 0     | 456    | 4     | 0    | 217   | 30     | 47    | 7     | 0    | 0    | 6977 | 9     | 7    | 11   | 13    | 9     | 7796         | 89.5       |
| GRPE           | 2              | 1    | 0    | 0    | 0    | 569   | 795    | 0    | 2     | 83     | 108   | 0    | 40    | 30     | 764   | 02    | 0    | 0    | 0    | 21959 | 8    | 2    | 10    | 43    | 24418        | 89.9       |
| FVEG           | 0              | 10   | 0    | 0    | 5    | 63    | 104    | 14   | 1     | 287    | 61    | 0    | 914   | 114    | 545   | 6     | 0    | 0    | 20   | 92    | 4999 | 133  | 215   | 584   | 8167         | 61.2       |
| FPLA           | 1              | 4    | 0    | 0    | 5    | 94    | 1790   | 12   | 1     | 1143   | 1056  | 0    | 428   | 770    | 862   | 64    | 1    | 0    | 101  | 136   | 277  | 4071 | 656   | 132   | 11604        | 35.1       |
| SCER           | 0              | 3    | 0    | 0    | 1    | 56    | 376    | 0    | 1     | 2489   | 238   | 1    | 624   | 1485   | 1175  | 21    | 0    | 0    | 34   | 187   | 117  | 123  | 10815 | 132   | 17878        | 60.5       |
| VEG            | 3              | 16   | 0    | 0    | 6    | 328   | 151    | 36   | 2     | 479    | 164   | 0    | 704   | 207    | 1100  | 29    | 0    | 0    | 15   | 304   | 414  | 80   | 197   | 7002  | 11237        | 62.3       |
| $\Sigma$ CLASS | 372            | 1054 | 7    | 26   | 4783 | 24008 | 155276 | 838  | 11056 | 186551 | 51262 | 106  | 96608 | 202209 | 31794 | 36495 | 554  | 20   | 7434 | 27160 | 6591 | 4968 | 14367 | 10379 | O.A.         | 88.9       |
| Prec. (%)      | 83.6           | 91.3 | 100  | 100  | 87.2 | 78.9  | 85.9   | 88.5 | 99.5  | 94.2   | 79.6  | 92.5 | 91.9  | 95.3   | 55.9  | 97.9  | 97.5 | 95.0 | 93.9 | 80.6  | 75.6 | 81.9 | 75.3  | 67.5  |              |            |
| F1-score       | 19.3           | 89.0 | 87.5 | 39.4 | 77.4 | 74.6  | 88.3   | 13.0 | 98.6  | 95.4   | 80.9  | 56.2 | 93.9  | 96.1   | 54.2  | 97.2  | 98.0 | 36.9 | 91.6 | 85.2  | 67.8 | 49.1 | 67.1  | 64.8  |              |            |

**Table S2.** Confusion matrix of crop categorization with Random Forest using randomly selected 1000 parcels per category

| Class data     | Reference Data |      |      |      |      |      |      |      |      |      |      |       |      |      |      |      |      |      |      |              |             |
|----------------|----------------|------|------|------|------|------|------|------|------|------|------|-------|------|------|------|------|------|------|------|--------------|-------------|
|                | SHR            | SUG  | FRST | TREE | GRAS | HERB | WEED | MAIZ | ALF  | SUNF | WCER | FLAND | RAPS | SOY  | GRPE | FVEG | FPLA | SCER | VEG  | $\Sigma$ REF | Recall (%)  |
| SHR            | 106            | 0    | 1    | 214  | 208  | 0    | 1    | 13   | 41   | 4    | 9    | 114   | 0    | 0    | 281  | 0    | 1    | 1    | 6    | 1000         | 10.6        |
| SUG            | 0              | 869  | 0    | 3    | 1    | 0    | 0    | 26   | 4    | 72   | 1    | 1     | 0    | 5    | 1    | 0    | 2    | 3    | 12   | 1000         | 86.9        |
| FRST           | 0              | 0    | 726  | 67   | 134  | 0    | 1    | 5    | 6    | 3    | 0    | 28    | 0    | 0    | 17   | 0    | 0    | 0    | 13   | 1000         | 72.6        |
| TREE           | 0              | 0    | 9    | 710  | 111  | 0    | 0    | 8    | 31   | 5    | 4    | 48    | 1    | 0    | 57   | 2    | 1    | 3    | 10   | 1000         | 71.0        |
| GRAS           | 0              | 0    | 1    | 11   | 906  | 0    | 0    | 6    | 35   | 3    | 7    | 22    | 0    | 0    | 2    | 0    | 1    | 4    | 2    | 1000         | 90.6        |
| HERB           | 0              | 3    | 1    | 65   | 70   | 206  | 0    | 72   | 38   | 35   | 77   | 124   | 24   | 1    | 37   | 42   | 15   | 22   | 168  | 1000         | 20.6        |
| WEED           | 0              | 0    | 2    | 3    | 14   | 0    | 979  | 0    | 0    | 0    | 0    | 2     | 0    | 0    | 0    | 0    | 0    | 0    | 0    | 1000         | 97.9        |
| MAIZ           | 0              | 0    | 0    | 1    | 0    | 0    | 0    | 960  | 0    | 16   | 10   | 6     | 0    | 0    | 0    | 0    | 0    | 3    | 4    | 1000         | 96.0        |
| ALF            | 0              | 0    | 0    | 9    | 107  | 1    | 0    | 14   | 817  | 5    | 7    | 15    | 0    | 0    | 5    | 2    | 4    | 13   | 1    | 1000         | 81.7        |
| SUNF           | 0              | 0    | 0    | 0    | 1    | 0    | 0    | 16   | 1    | 964  | 6    | 7     | 0    | 0    | 1    | 0    | 1    | 1    | 2    | 1000         | 96.4        |
| WCER           | 0              | 0    | 0    | 0    | 2    | 0    | 0    | 8    | 4    | 2    | 967  | 9     | 3    | 0    | 0    | 0    | 0    | 5    | 0    | 1000         | 96.7        |
| FLAND          | 0              | 0    | 2    | 27   | 180  | 1    | 2    | 31   | 21   | 26   | 77   | 548   | 4    | 2    | 32   | 7    | 4    | 9    | 27   | 1000         | 54.8        |
| RAPS           | 0              | 0    | 0    | 1    | 2    | 0    | 0    | 0    | 2    | 1    | 23   | 4     | 964  | 1    | 0    | 0    | 0    | 2    | 0    | 1000         | 96.4        |
| SOY            | 0              | 1    | 0    | 0    | 0    | 0    | 0    | 60   | 0    | 23   | 5    | 8     | 2    | 892  | 3    | 2    | 2    | 0    | 2    | 1000         | 89.2        |
| GRPE           | 0              | 1    | 0    | 22   | 26   | 0    | 0    | 6    | 4    | 1    | 5    | 32    | 1    | 0    | 900  | 0    | 0    | 0    | 2    | 1000         | 90.0        |
| FVEG           | 0              | 0    | 0    | 12   | 10   | 1    | 0    | 30   | 11   | 122  | 10   | 48    | 0    | 2    | 13   | 616  | 23   | 33   | 69   | 1000         | 61.6        |
| FPLA           | 0              | 0    | 0    | 4    | 173  | 0    | 0    | 105  | 93   | 33   | 70   | 73    | 8    | 10   | 8    | 28   | 330  | 53   | 12   | 1000         | 33.0        |
| SCER           | 0              | 0    | 1    | 2    | 22   | 0    | 0    | 155  | 16   | 33   | 84   | 71    | 1    | 2    | 12   | 6    | 10   | 576  | 9    | 1000         | 57.6        |
| VEG            | 0              | 2    | 1    | 28   | 23   | 4    | 0    | 42   | 13   | 67   | 9    | 85    | 5    | 1    | 28   | 26   | 5    | 15   | 646  | 1000         | 64.6        |
| $\Sigma$ CLASS | 106            | 876  | 744  | 1179 | 1990 | 213  | 983  | 1557 | 1137 | 1415 | 1371 | 1245  | 1013 | 916  | 1397 | 731  | 399  | 743  | 985  | <b>O.A.</b>  | <b>72.0</b> |
| Prec. (%)      | 100            | 99.2 | 97.6 | 60.2 | 45.5 | 96.7 | 99.6 | 61.7 | 71.9 | 68.1 | 70.5 | 44.0  | 95.2 | 97.4 | 64.4 | 84.3 | 82.7 | 77.5 | 65.6 |              |             |
| F1-score       | 19.2           | 92.6 | 83.3 | 65.2 | 60.6 | 34.0 | 98.7 | 75.1 | 76.5 | 79.8 | 81.6 | 48.8  | 95.8 | 93.1 | 75.1 | 71.2 | 47.2 | 66.1 | 65.1 |              |             |

**Table S3.** Overview of spectral indices used for crop classification

| Index name                             | Abbreviation | Formula                                                                         |
|----------------------------------------|--------------|---------------------------------------------------------------------------------|
| Normalized Difference Vegetation Index | NDVI         | $\frac{Band8 - Band4}{Band8 + Band4}$                                           |
| Bare Soil Index                        | BSI          | $\frac{(Band11 + Band4) - (Band8 + Band2)}{(Band11 + Band4) + (Band8 + Band2)}$ |
| Enhanced Vegetation Index              | EVI          | $\frac{Band8 - Band4}{Band8 + 6 \times Band4 - 7.5 \times Band2 + 1}$           |
| Structure Intensitive Pigment Index    | SIPi         | $\frac{Band8 - Band2}{Band8 - Band4}$                                           |
| Yellow Crop Index                      | YCI          | $(Band4 + Band3) - (2 \times Band2)$                                            |

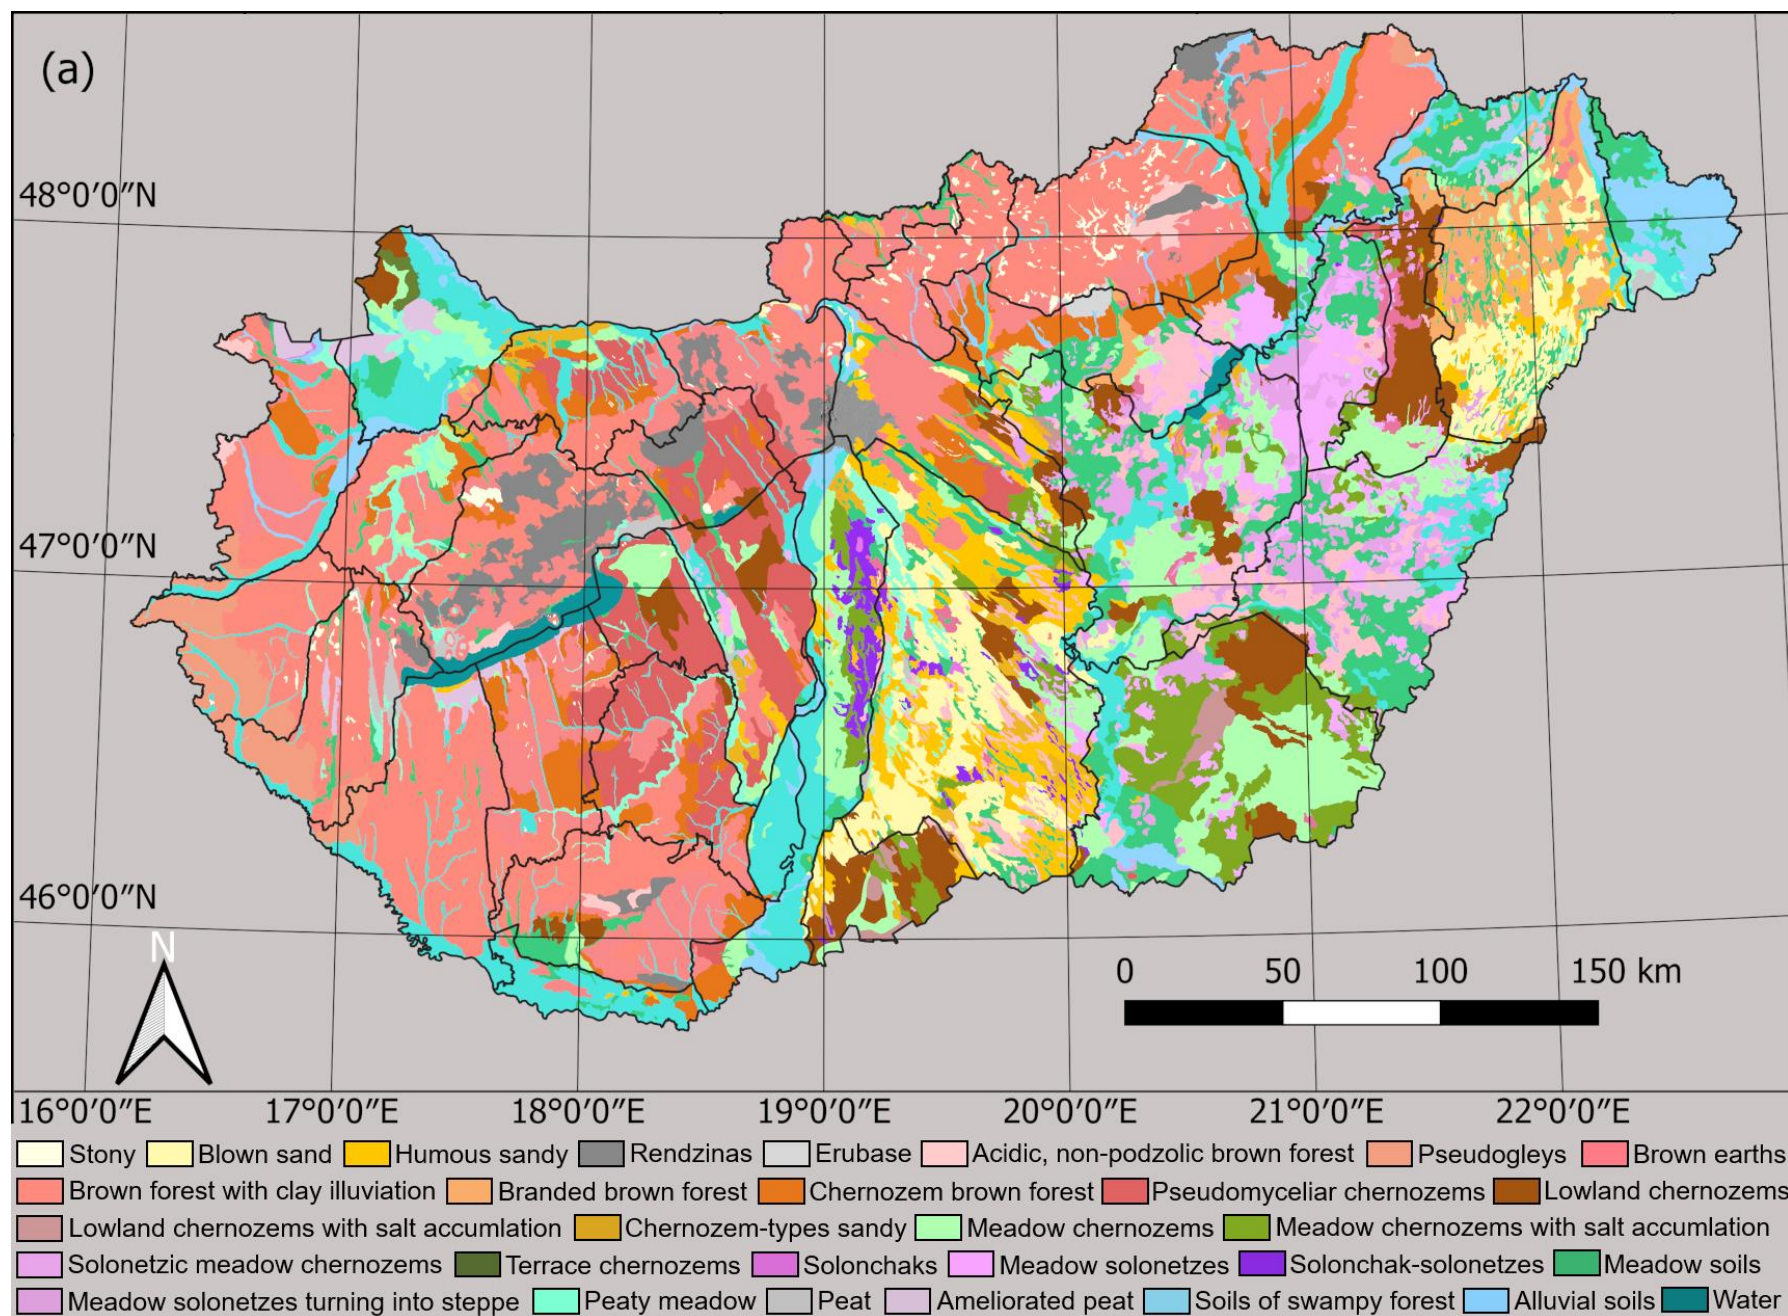

**Figure S1.** Agro-ecological zones of Hungary, used for stratifying crop classification, overlain on soil map where individual colours represent different soil types

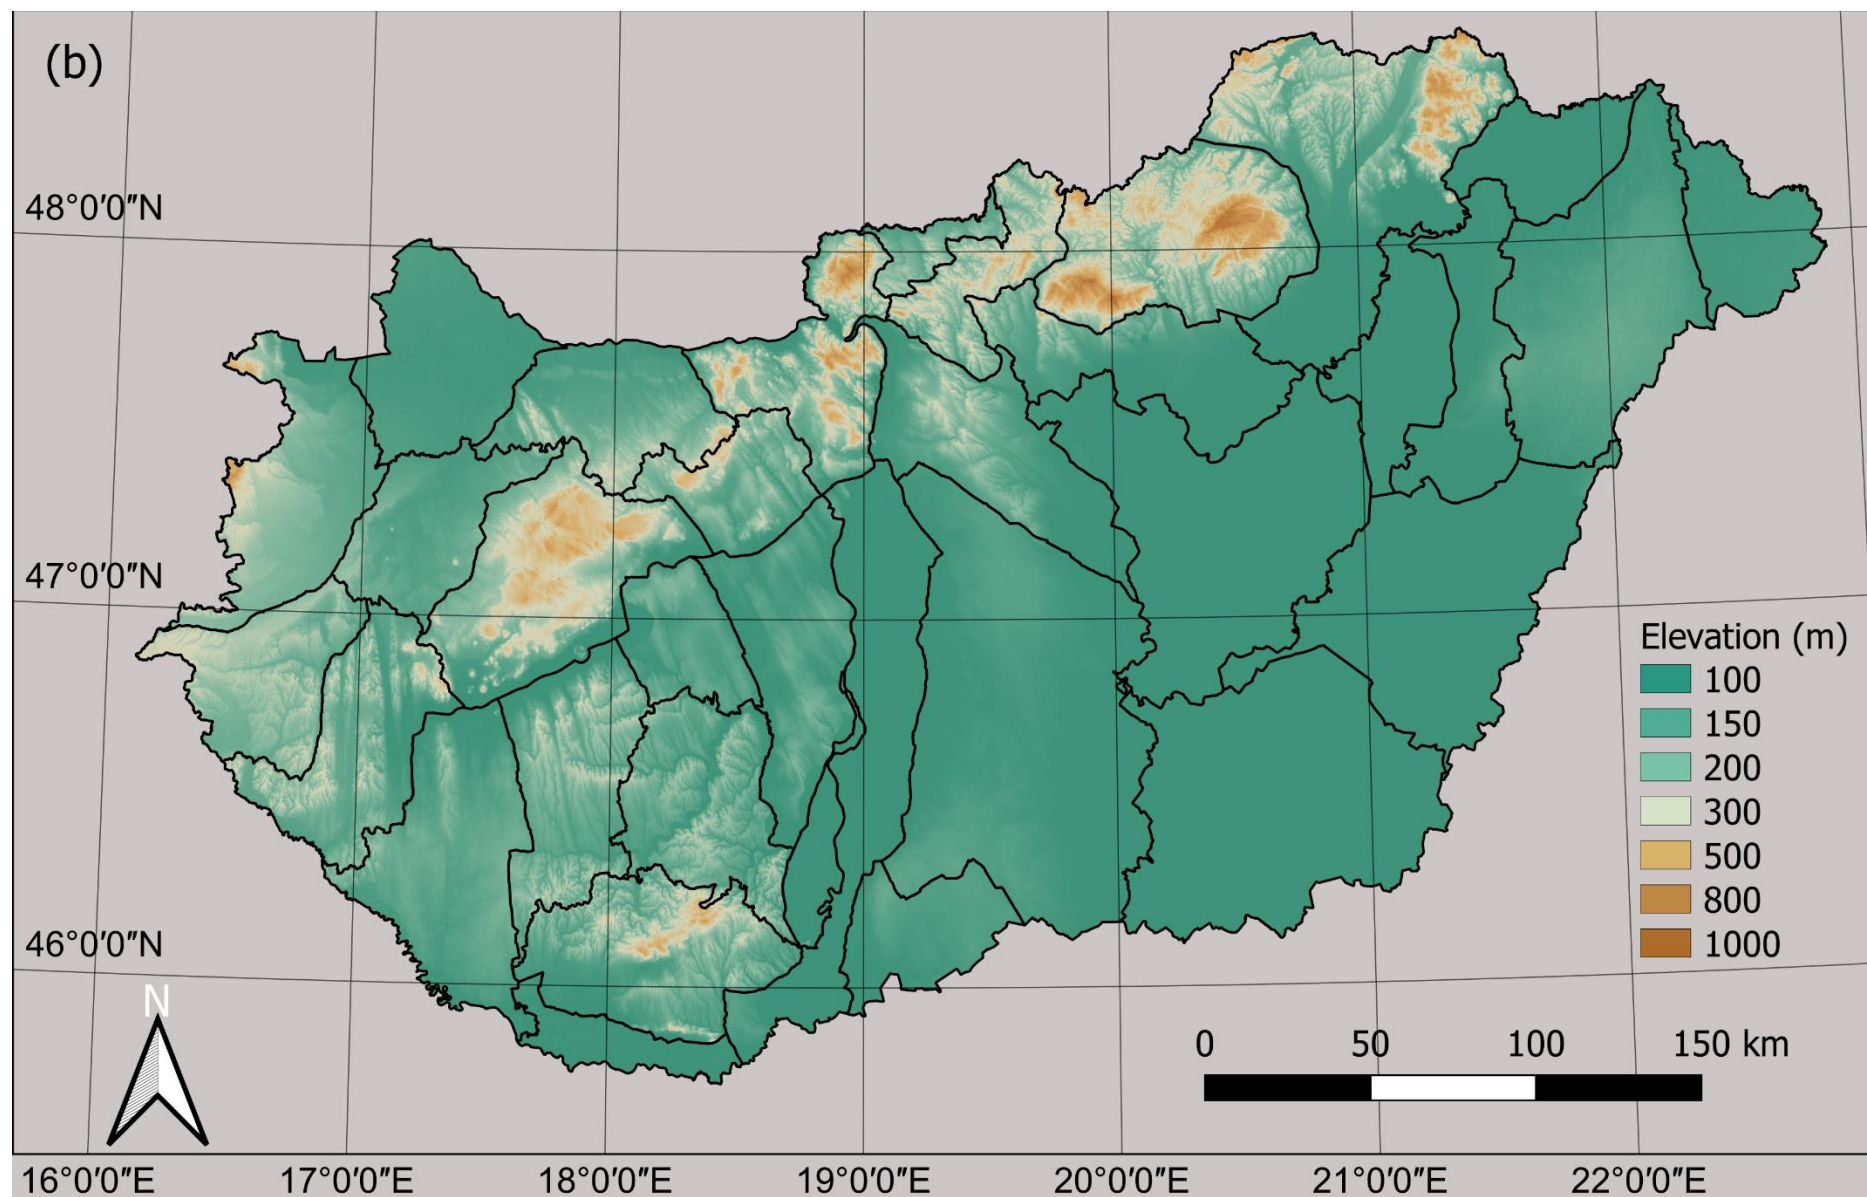

**Figure S2.** Agro-ecological zones of Hungary, used for stratifying crop classification, overlain on digital elevation model

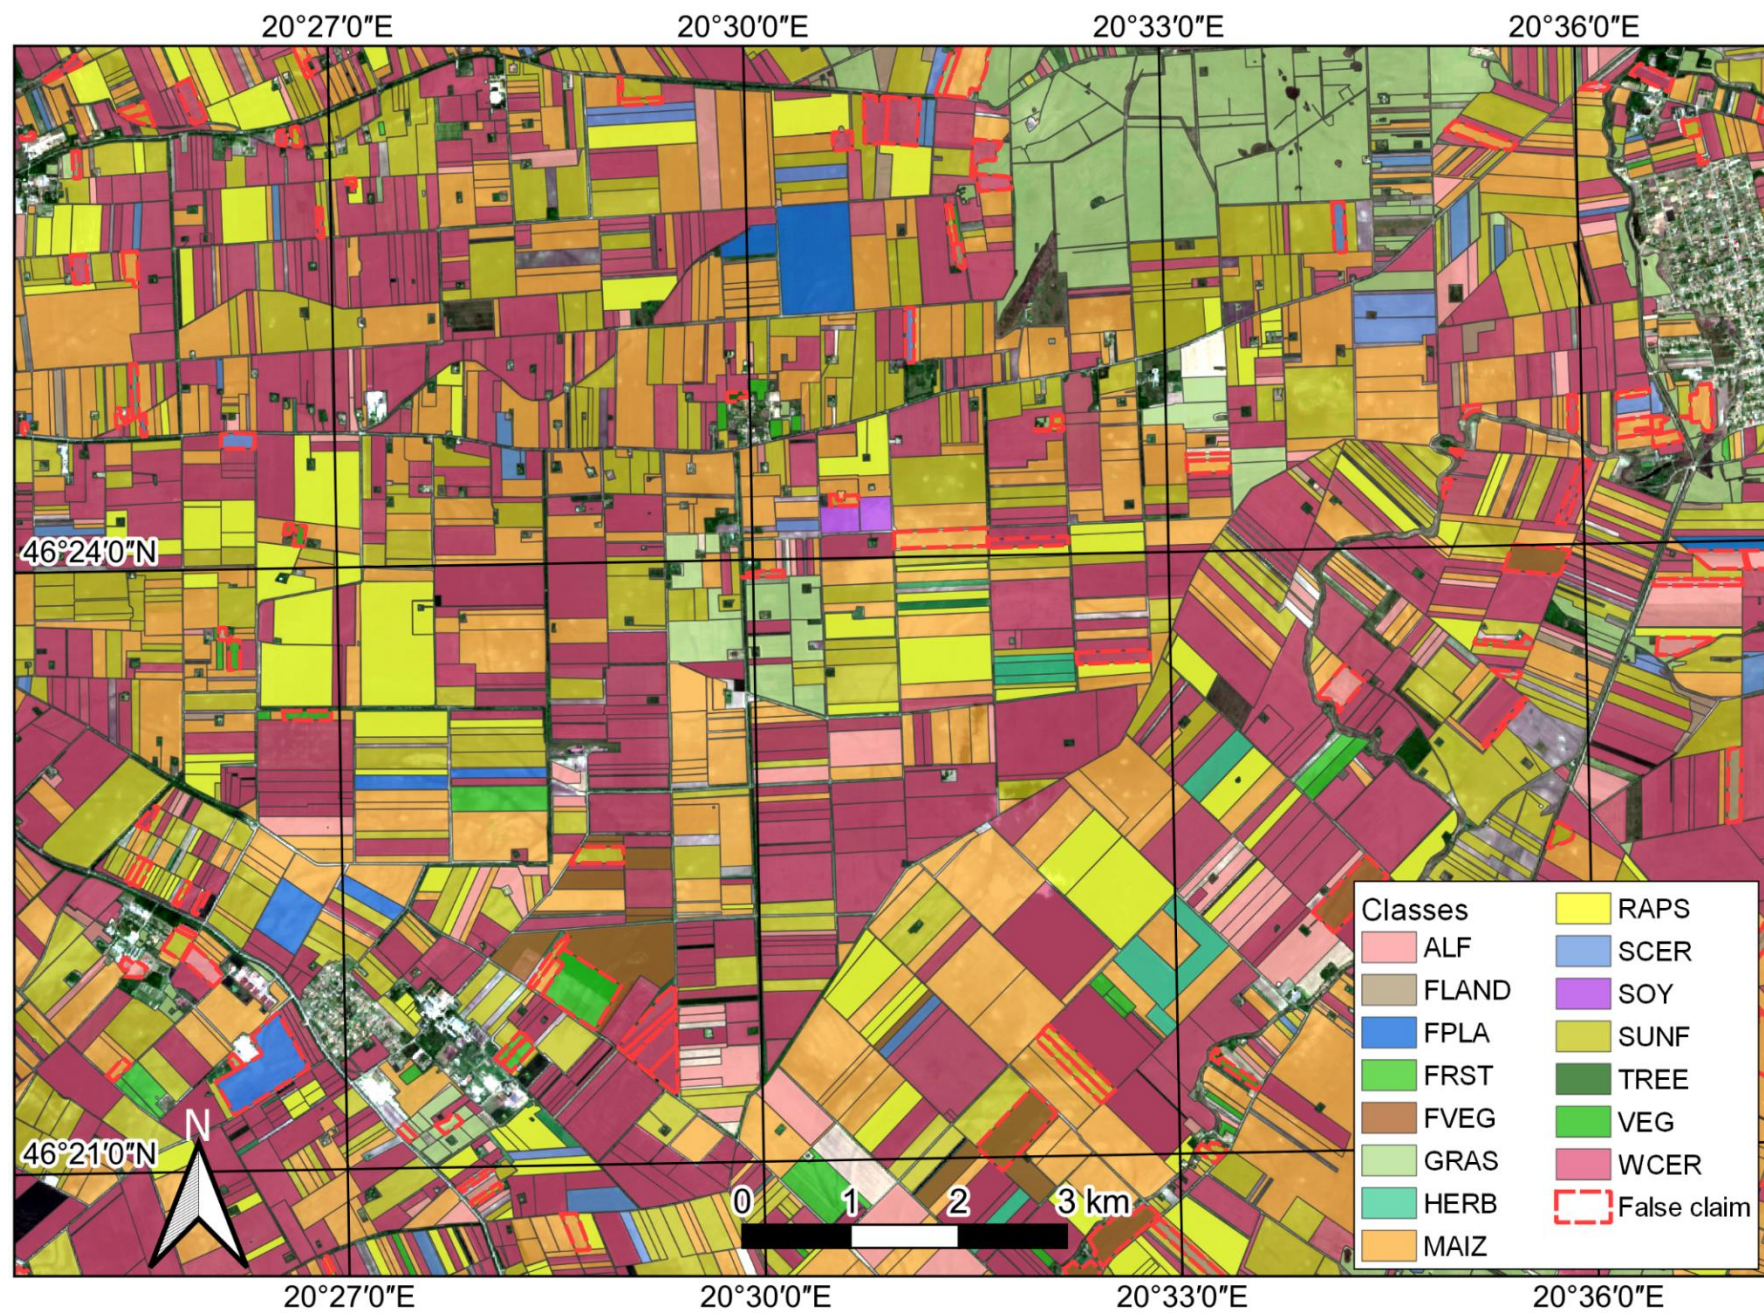

Figure S3. Example of crop type classification result with false claims (red dashed outline)
